# Supplementary material
Source: Research Square preprint supplement (doi:10.21203/rs.3.rs-8034271/v1)
Supplement: Supplementary file 1 [file 9a1be95df0f46844c792c34c.docx]

Supplementary Material for

**The supply-demand dynamics of lithium resources and sustainable path-ways for vehicle electrification in China**

Li Song1,3, Weijing Wang2, Hui Hua4, Songyan Jiang2,5*, Xuewei Liu 6

1. School of Tourism Management, Nanjing institute of tourism and hospitality, Nanjing 211100, China;
2. School of Management Science and Engineering, Nanjing University of Information Science and Technology, Nanjing 210044, China;
3. College of Economics and Management, Nanjing Forestry University, Nanjing 210037, China;
4. School of Business, Nanjing University of Information Science and Technology, Nanjing 210044, China
5. Jiangsu Skytech Industrial Internet Co., Ltd, Nanjing 2111899, PR China
6. SDU Life Cycle Engineering, Departement of Green Technology, University of Southern Denmark, 5230 Odense, Denmark

*Corresponding author at: School of Management Science and Engineering, Nanjing University of Information Science and Technology, Nanjing 210044, PR China

E-mail address: jiangsongyan1989@foxmail.com (S. Jiang).

Table S1 Proportion of electric vehicle (unit: %)

| Year | LFP | NMC | PHEV | BEV |
| --- | --- | --- | --- | --- |
| 2015 | 55 | 45 | 18 | 82 |
| 2016 | 50 | 50 | 23 | 77 |
| 2017 | 50 | 50 | 19 | 81 |
| 2018 | 38 | 62 | 24 | 76 |
| 2019 | 32 | 68 | 20 | 80 |
| 2020 | 35 | 65 | 17 | 83 |
| 2021 | 48 | 52 | 17 | 83 |
| 2022 | 61 | 39 | 22 | 78 |
| 2023 | 64 | 36 | 30 | 70 |
| 2024 | 65 | 35 | 40 | 60 |

Table S2 Technical parameters of electric vehicles

| Year | Driving range (km) | | Energy content kWh | | Energy density kWh/kg | |
| --- | --- | --- | --- | --- | --- | --- |
| PHEV | BEV | PHEV | BEV | LFP | NMC |
| 2015 | 53 | 150 | 6 | 17 | 98 | 150 |
| 2016 | 60 | 170 | 7 | 21 | 101 | 155 |
| 2017 | 67 | 190 | 9 | 25 | 104 | 160 |
| 2018 | 79 | 225 | 11 | 32 | 107 | 165 |
| 2019 | 92 | 263 | 14 | 39 | 111 | 170 |
| 2020 | 105 | 300 | 16 | 47 | 114 | 175 |
| 2021 | 119 | 340 | 19 | 55 | 117 | 180 |
| 2022 | 133 | 380 | 22 | 63 | 120 | 185 |
| 2023 | 147 | 420 | 25 | 71 | 124 | 190 |
| 2024 | 161 | 460 | 28 | 79 | 127 | 195 |
| 2035 | 228 | 650 | 41 | 117 | 163 | 250 |

Table S3 The cumulative lithium demand of EVs under different scenarios during 2024-2035 in China (unit: ton).

| Year | BAU | TAE | TBT | TED | TLB | TTC | MTS | MDR |
| --- | --- | --- | --- | --- | --- | --- | --- | --- |
| 2024 | 53144 | 53144 | 53144 | 47646 | 53144 | 47646 | 53144 | 53144 |
| 2025 | 117676 | 118843 | 117642 | 105008 | 113802 | 102511 | 122221 | 128471 |
| 2026 | 201955 | 206171 | 201833 | 179319 | 191851 | 173746 | 212302 | 226528 |
| 2027 | 299054 | 308540 | 298779 | 264280 | 279141 | 254148 | 315811 | 338851 |
| 2028 | 408320 | 425713 | 407816 | 359198 | 373919 | 342263 | 432028 | 464627 |
| 2029 | 542389 | 571908 | 541534 | 474866 | 488500 | 449794 | 574707 | 619145 |
| 2030 | 698838 | 745337 | 697491 | 608964 | 620865 | 575201 | 741433 | 800003 |
| 2031 | 890046 | 960758 | 887998 | 771846 | 783916 | 731161 | 945770 | 1022390 |
| 2032 | 1110067 | 1212619 | 1107096 | 958169 | 972184 | 912980 | 1181397 | 1279477 |
| 2033 | 1342457 | 1482844 | 1338390 | 1153866 | 1168989 | 1104885 | 1430513 | 1551589 |
| 2034 | 1587785 | 1772551 | 1582432 | 1359355 | 1373358 | 1306103 | 1693583 | 1839056 |
| 2035 | 1839965 | 2074912 | 1833158 | 1569505 | 1577760 | 1509310 | 1964030 | 2134621 |
